# Supplementary material
Source: PubMed Central journal article supplement (PMC9651181)
Supplement: ehp10808.s001.acco.pdf [file ehp10808.s001.acco.pdf]

**Note to readers with disabilities:** *EHP* strives to ensure that all journal content is accessible to all readers. However, some figures and Supplemental Material published in *EHP* articles may not conform to [508 standards](#) due to the complexity of the information being presented. If you need assistance accessing journal content, please contact [ehp508@niehs.nih.gov](mailto:ehp508@niehs.nih.gov). Our staff will work with you to assess and meet your accessibility needs within 3 working days.

### **Supplemental Material**

#### **A Systematic Review of Mercury Exposures from Skin-Lightening Products**

Ashley Bastiansz, Jessica Ewald, Verónica Rodríguez Saldaña, Andrea Santa-Rios, and Niladri Basu

#### **Table of Contents**

**Table S1.** Measurement instruments and abbreviations used for skin-lightening product analysis. These data cover 738 product samples from 25 studies.

**Table S2.** Measurement instruments and abbreviations used for human biomarker analysis. These data cover 1,042 biomarker measures from 9 studies.

**Table S3.** Different toxic chemicals measured in papers in the “Hg in products” data group.

**Table S4.** Case reports of individuals that experienced an adverse reaction following exposure to a mercury-added skin-lightening product. AFRO = African Region; EMRO = Eastern Mediterranean Region; EURO = European Region; PAHO = Pan America Health Region; SEARO = South-East Asia Region; WPRO = Western Pacific Region.

**Figure S1.** PRISMA flow diagram detailing how articles were identified, reviewed, and deemed eligible for inclusion in the current study.

#### **References**

**Additional File-** Excel Document

**Table S1.** Measurement instruments and abbreviations used for skin-lightening product analysis. These data cover 738 product samples from 25 studies.

| <b>Measurement instrument used for testing skin-lightening products</b> | <b>No. of samples (%)</b> |
|-------------------------------------------------------------------------|---------------------------|
| Atomic absorption spectroscopy (AAS)                                    | 94 (11.94%)               |
| Screen-printed silver electrode (AgSPE)                                 | 3 (0.38%)                 |
| Cold vapor atomic absorption spectrometry (CVAAS)                       | 466 (59.21%)              |
| Flame atomic absorption spectrometry (FAAS)                             | 6 (0.76%)                 |
| Inductively coupled plasma mass spectrometry (ICP-MS)                   | 38 (4.83%)                |
| Inductively coupled plasma-optical emission spectrometry (ICP-OES)      | 78 (9.91%)                |
| Inductively coupled plasma atomic emission spectrometry (ICP-AES)       | 49 (6.23%)                |
| Particle Induced X-Ray Emission (PIXE)                                  | 27 (3.43%)                |
| Unknown                                                                 | 26 (3.30%)                |

**Table S2.** Measurement instruments and abbreviations used for human biomarker analysis. These data cover 1,042 biomarker measures from 9 studies.

| <b>Measurement instrument used for testing human biomarkers</b> | <b>No. of samples (%)</b> |
|-----------------------------------------------------------------|---------------------------|
| Atomic absorption spectroscopy (AAS)                            | 40 (3.8%)                 |
| Advanced mercury analyzer (AMA)                                 | 62 (6.0%)                 |
| Cold vapor atomic absorption spectrometry (CVAAS)               | 11 (1.1%)                 |
| Inductively coupled plasma mass spectrometry (ICP-MS)           | 13 (1.3%)                 |
| Particle Induced X-Ray Emission (PIXE)                          | 148 (3.4%)                |
| Unknown                                                         | 768 (73.7%)               |

**Table S3.** Different toxic chemicals measured in papers in the “Hg in products” data group.

| No. | Author, year                            | Chemicals measured                                                                     |
|-----|-----------------------------------------|----------------------------------------------------------------------------------------|
| 1   | Agorku et al., 2016 <sup>1</sup>        | Mercury, Hydroquinone                                                                  |
| 2   | Murphy et al., 2009 <sup>2</sup>        | Mercury                                                                                |
| 3   | Ho et al., 2017 <sup>3</sup>            | Mercury                                                                                |
| 4   | Zainy, 2015 <sup>4</sup>                | Mercury, Cadmium, Bismuth, Palladium, Arsenic, Titanium, Titanium dioxide, Thallium    |
| 5   | Harada et al., 2001 <sup>5</sup>        | Mercury                                                                                |
| 6   | Peregrino et al., 2011 <sup>6</sup>     | Mercury                                                                                |
| 7   | Gbetoh & Amyot, 2016 <sup>7</sup>       | Mercury, hydroquinone and clobetasol propionate                                        |
| 8   | Al-Saleh et al., 2012 <sup>8</sup>      | Mercury, Titanium dioxide, Hydroquinone, Corticosteroids,                              |
| 9   | Yang et al., 2014 <sup>9</sup>          | Mercury                                                                                |
| 10  | Salama, 2016 <sup>10</sup>              | Lead, Mercury, Cadmium, Arsenic, Copper, Nickel, Cobalt, Manganese, Chromium, Aluminum |
| 11  | Wang & Zhang, 2015 <sup>11</sup>        | Mercury                                                                                |
| 12  | McKelvey et al., 2011 <sup>12</sup>     | Mercury                                                                                |
| 13  | Ashraf et al., 2020 <sup>13</sup>       | Mercury, Cadmium, Lead, Arsenic, Chromium, Nickel, Cobalt, Copper, Zinc, Iron          |
| 14  | Selvaraju et al., 2020 <sup>14</sup>    | Mercury, Arsenic, Cadmium, Lead                                                        |
| 15  | Abbas et al., 2020 <sup>15</sup>        | Mercury                                                                                |
| 16  | Kanwal et al., 2019 <sup>16</sup>       | Mercury                                                                                |
| 17  | Kinabo, 2005 <sup>17</sup>              | Mercury                                                                                |
| 18  | Voegborlo et al., 2008 <sup>18</sup>    | Mercury                                                                                |
| 19  | Alqadami et al., 2017 <sup>19</sup>     | Mercury, Arsenic, Bismuth, Cadmium, Lead, Titanium                                     |
| 20  | Alqadami et al., 2013 <sup>20</sup>     | Mercury, Arsenic, Bismuth, Cadmium, Lead, Titanium                                     |
| 21  | Maneli et al., 2016 <sup>21</sup>       | Mercury, Betamethasone, Clobetasol propionate, Hydroquinone; Kojic acid                |
| 22  | Ababneh & Al-Momani, 2018 <sup>22</sup> | Mercury, Lead, Cadmium, Nickel                                                         |
| 23  | Mohammed et al., 2017 <sup>23</sup>     | Mercury, Arsenic                                                                       |
| 24  | Amponsah et al., 2014 <sup>24</sup>     | Mercury                                                                                |
| 25  | Cristaudo et al., 2013 <sup>25</sup>    | Mercury, Cadmium, Cobalt, Chromium, Nickel, Lead                                       |

**Table S4.** Case reports of individuals that experienced an adverse reaction following exposure to a mercury-added skin-lightening product. AFRO = African Region; EMRO = Eastern Mediterranean Region; EURO = European Region; PAHO = Pan America Health Region; SEARO = South-East Asia Region; WPRO = Western Pacific Region.

| Authors, year                        | Ethnicity/<br>Race | Country        | WHO<br>Region | Clinical Details                                                                                                                                                                                                                                                                                                                                                                                                    |
|--------------------------------------|--------------------|----------------|---------------|---------------------------------------------------------------------------------------------------------------------------------------------------------------------------------------------------------------------------------------------------------------------------------------------------------------------------------------------------------------------------------------------------------------------|
| Drescher et al., 2013 <sup>26</sup>  | Barbadian          | Barbados       | PAHO          | In 2010, high mercury exposure was discovered in four Barbadian women of African ancestry (aged 39-54) during a study analyzing mercury body-burden amongst individuals working in the fishing industry. All women were using or previously used skin-lightening creams, and had hair inorganic mercury concentrations 361-561 µg/g and spot urine inorganic mercury samples 7-135 µg/L.                            |
| Soo et al., 2003 <sup>27</sup>       | Indonesian         | China          | WPRO          | A 34-year-old Indonesian woman working in Hong Kong for a year and had two weeks of frothy urine and ankle swelling after applying an Indonesian skin-lightening cream on her face every day for five years. She had elevated blood mercury levels of 163nmol/L (59.09 µg/L) and a 24-hour urinary mercury excretion rate of 754.6nmol/day, and the mercury concentration of the cream was 1762 µg/g.               |
| Sun et al., 2017 <sup>28</sup>       | Chinese            | China          | WPRO          | From 2009 to 2017, 16 patients (aged 19-50 years) that had a history of using skin lightening creams (one product contained 19,742 ± 379 µg/g of mercury) were diagnosed with chronic mercury intoxication. All patients had a 24-hour urine mercury content of these patients was within 0.037-0.170 mg/L (37 µg/L to 170 µg/L), and patients mentioned body pain, tremors, insomnia, irritability and depression. |
| Dickenson et al., 2013 <sup>29</sup> | Mexican            | USA            | PAHO          | A research study assessing environmental chemical exposure in pregnant women and their infants identified 1 participant out of 77 that had elevated levels of mercury (whole blood mercury level 15.16 µg/L, umbilical cord blood: 5.8 µg/L and urine mercury level 40 µg/L). The participant had been using two skin-lightening creams purchased in Mexico containing 21,000 and 30,000 µg/g of mercury.           |
| Bwomda et al., 2005 <sup>30</sup>    | African            | Belgium        | EURO          | A 24-year-old African woman presented at the emergency department six months after developing symptoms including glucocorticosteroid induced arterial hypertension, weight gain, amenorrhea, and signs of Cushing's syndrome after full body application of a skin-lightening cream for ~10 years.                                                                                                                  |
| Chakera et al., 2011 <sup>31</sup>   | Pakistani          | United Kingdom | EURO          | Two Pakistani women (aged 44 and 26 years) were referred for investigation of the nephrotic syndrome after renal biopsies showed that they had membranous glomerulonephritis associated to usage of skin-lightening creams. Their serum and urinary mercury-creatinine ratio was 150nmol/L and 16.5nmol/mmol, and 233 nmol/l and 77.5nmol/mmol, respectively.                                                       |

|                                           |               |               |      |                                                                                                                                                                                                                                                                                                                                                                                                                                                                                                                                         |
|-------------------------------------------|---------------|---------------|------|-----------------------------------------------------------------------------------------------------------------------------------------------------------------------------------------------------------------------------------------------------------------------------------------------------------------------------------------------------------------------------------------------------------------------------------------------------------------------------------------------------------------------------------------|
| Ori et al., 2018 <sup>32</sup>            | Not indicated | USA           | PAHO | A 17-month-old toddler experienced three weeks symptoms including fussiness, constipation, and decreased appetite after being in contact with their mother and grandmother who were using skin-lightening creams. Toddler's whole blood mercury was 26 µg/L, and random spot mercury level of 243 µg/g creatinine. Mother and grandmother had elevated first void urine mercury levels of 197 µg/g creatinine and 222 µg/g creatinine, respectively, and skin-lightening cream contained mercury levels between 27,000 and 34,000 µg/g. |
| Copan et al., 2015 <sup>33</sup>          | Not indicated | USA           | PAHO | From 2010-2014, two infants and an adult, 20-month-old, 4-year-old, and 39-year-old, respectively, had elevated mercury levels between 52 µg/g to 482 µg/g creatinine, all associated with skin-lightening creams containing mercury levels between 20,000-57,000 µg/g.                                                                                                                                                                                                                                                                 |
| Zhang et al., 2014 <sup>34</sup>          | Chinese       | China         | WPRO | In 2010, a woman (aged 28-year-old) was admitted to the hospital after complaining for two weeks of pain in both limbs and facial edema and was diagnosed with nephrotic syndrome. She used a homemade skin-lightening cream for 11 months that contained 6.80 µg/g, and her blood and urinary mercury concentration was 220 µmol/L and 469 µmol/L, respectively.                                                                                                                                                                       |
| Tlacuilo-Parra et al., 2001 <sup>35</sup> | Mexican?      | Mexico        | PAHO | In 1996, a woman (aged 30-year-old) experienced burning face pain and excessive perspiration after using a daily facial skin-lightening cleanser listed with calomel for five years. Her urine mercury was 150 µg/L and whole blood mercury was µg/L.                                                                                                                                                                                                                                                                                   |
| Tang et al., 2006 <sup>36</sup>           | Chinese       | Hong Kong     | WPRO | A Chinese woman (aged 34-year-old) developed nephrotic syndrome, minimal change disease and increased mercury concentrations in blood (24.8 µg/L) and urine (57.4 µg/L) after daily usage of a skin-lightening cream contain 30,000 µg/g of mercury for 4 months. Her proteinuria returned to normal after 9 months, and her blood and urine became normal after 1 and 9 months respectively after cessation of usage.                                                                                                                  |
| Rakete et al., 2021 <sup>37</sup>         | Not indicated | Not indicated | EURO | A child (aged 4-year-old) was admitted to the hospital with symptoms including hypertension, increased sweating, behavioral changes and weight loss, and examinations revealed acute mercury poisoning. The child's mercury levels were 19 µg/L in urine and 37 µg/L in blood. The child's mother was using a facial cream bought online, containing approximately 18% mercury and the child was accidentally intoxicated by skin-to-skin contact with the mother.                                                                      |
| Chan et al., 2001 <sup>38</sup>           | Chinese       | Hong Kong     | WPRO | A woman (aged 38-year-old) had an asymptomatic increase in blood mercury concentration (18.8 µg/L) and a urine mercury excretion (69 µg/day) after daily use of a cosmetic cream for several months. The cream contained 6.5% mercury.                                                                                                                                                                                                                                                                                                  |
| Barit et al., 2020 <sup>39</sup>          | Filipino      | Philippines   | WPRO | A Filipino woman (aged 27-year-old) presented pruritic erythematous papules and plaques on the bilateral axillae after using a skin-lightening cream containing 6400 µg/g of mercury.                                                                                                                                                                                                                                                                                                                                                   |

|                                   |                  |     |      |                                                                                                                                                                                                                                                                                                                                                                                                                                                                                                                             |
|-----------------------------------|------------------|-----|------|-----------------------------------------------------------------------------------------------------------------------------------------------------------------------------------------------------------------------------------------------------------------------------------------------------------------------------------------------------------------------------------------------------------------------------------------------------------------------------------------------------------------------------|
| Kuehn, 2020 <sup>40</sup>         | Mexican American | USA | PAHO | A Mexican American woman (aged 47-year-old) developed dysesthesias and upper extremity weakness and hospitalized for two weeks with slurred speech and blurry vision after using two skin-lightening creams on her face twice daily for 7 years. She had blood mercury levels of 2620 µg/L and urinary mercury levels of 110 µg/L and underwent chelation therapy. Skin-lightening creams were purchased in Mexico and contained 12,000 µg/g of mercury; further testing of creams detected methyl mercury iodide.          |
| Kamani et al., 2019 <sup>41</sup> | Not indicated    | USA | PAHO | An infant (aged ten-month-old) was admitted to hospital with a one-month of symptoms including of a progressive desquamative papular rash, anorexia, weight loss and hypertension. Patient had whole blood mercury levels at 251 nmol/L and underwent empiric succimer chelation therapy for three weeks. The patient's mother purchased a locally made skin cream in Mexico containing elemental mercury at 56,000 µg/g and had been using it on her face/neck twice daily for 6 weeks before onset of patient's symptoms. |

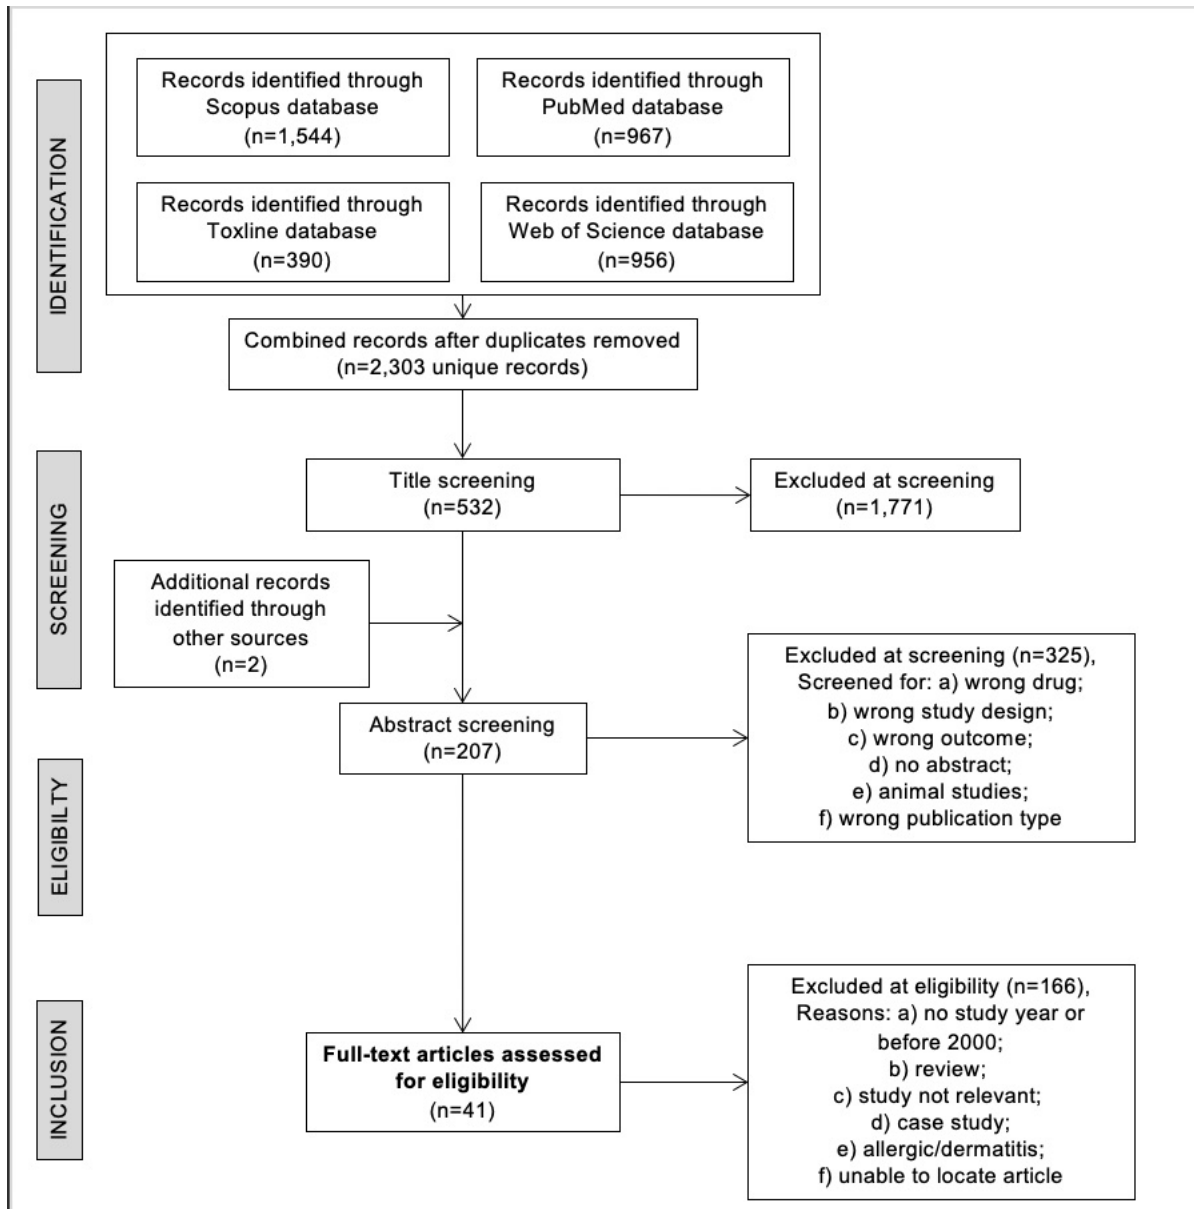

**Figure S1.** PRISMA flow diagram detailing how articles were identified, reviewed, and deemed eligible for inclusion in the current study.



## References cited in this Supplemental Materials doc file

1. Agorku ES, Kwaansa-Ansah EE, Voegborlo RB, Amegbletor P, Opoku F. Mercury and hydroquinone content of skin toning creams and cosmetic soaps, and the potential risks to the health of Ghanaian women. *Springerplus*. 2016;5. doi:10.1186/s40064-016-1967-1
2. Murphy T, Slotton DG, Irvine K, Sukontason K, Goldman CR. Mercury Contamination of Skin Whiteners in Cambodia. *Hum Ecol RISK Assess*. 2009;15(6):1286-1303. doi:10.1080/10807030903306877
3. Ho Y Bin, Abdullah NH, Hamsan H, Tan ESS. Mercury contamination in facial skin lightening creams and its health risks to user. *Regul Toxicol Pharmacol*. 2017;88:72-76. doi:10.1016/j.yrtph.2017.05.018
4. Zainy FM. Determination of Heavy Metals in 16 Bleaching Creams and 3 Mixtures of Bleaching Creams from Local Market of Jeddah. *Egypt J Chem*. 2015;58(3):377-386.
5. Harada M, Nakachi S, Tasaka K, et al. Wide use of skin-lightening soap may cause mercury poisoning in Kenya. *Sci Total Environ*. 2001;269(1-3):183-187. doi:10.1016/S0048-9697(00)00812-3
6. Peregrino CP, Moreno M V., Miranda S V., Rubio AD, Leal LO. Mercury Levels in Locally Manufactured Mexican Skin-Lightening Creams. *Int J Environ Res Public Health*. 2011;8(6):2516-2523. doi:10.3390/ijerph8062516
7. Gbetoh MH, Amyot M. Mercury, hydroquinone and clobetasol propionate in skin lightening products in West Africa and Canada. *Environ Res*. 2016;150:403-410. doi:10.1016/j.envres.2016.06.030
8. Al-Saleh I, Elkhatib R, Al-Rouqi R, Al-Enazi S, Shinwari N. The dangers of skin-lightening creams. *Toxicol Environ Chem*. 2012;94(1):195-219. doi:10.1080/02772248.2011.631925
9. Yang H-H, Chen P-Y, Ho P-H, Shih Y. Direct Analysis of Mercury in Cosmetics Using Screen-Printed Silver Electrodes and Flow Injection Analysis. *J Electrochem Soc*. 2014;161(6):B137-

- B142. doi:10.1149/2.057406jes
10. Salama AK. Assessment of metals in cosmetics commonly used in Saudi Arabia. *Environ Monit Assess.* 2016;188(10):553. doi:10.1007/s10661-016-5550-6
  11. Wang L, Zhang H. Mercury content in marketed cosmetics: analytical survey in Shijiazhuang, China. *Cutan Ocul Toxicol.* 2015;34(4):322-326.
  12. McKelvey W, Jeffery N, Clark N, Kass D, Parsons PJ. Population-based inorganic mercury biomonitoring and the identification of skin care products as a source of exposure in New York City. *Environ Health Perspect.* 2011;119(2):203-209. doi:10.1289/ehp.1002396
  13. Ashraf T, Taneez M, Kalsoom S, Irfan T, Shafique MA. Experimental Calculations of Metals Content in Skin-Whitening Creams and Theoretical Investigation for Their Biological Effect Against Tyrosinase Enzyme. *Biol Trace Elem Res.* Published online 2020. doi:10.1007/s12011-020-02441-z
  14. Selvaraju A, Abdul Halim ANS, Keyon ASA. Determination of selected heavy metal concentrations in unregistered face whitening creams sold in Johor Bahru, Johor, Malaysia by using inductively coupled plasma optical emission spectroscopy and their health risk assessment [Penentuan kepekatan logam b. *Malaysian J Anal Sci.* 2020;24(5):670-681. <https://www.scopus.com/inward/record.uri?eid=2-s2.0-85092532894&partnerID=40&md5=9cd4c3eefd13ee08e06e34245026a504>
  15. Abbas HH, Sakakibara M, Sera K, Nurgahayu, Andayanie E. Mercury exposure and health problems of the students using skin-lightening cosmetic products in Makassar, South Sulawesi, Indonesia. *Cosmetics.* 2020;7(3). doi:10.3390/COSMETICS7030058
  16. Kanwal S, Yamakawa A, Narukawa T, Yoshinaga J. Speciation and isotopic characterization of mercury detected at high concentration in Pakistani hair samples. *Chemosphere.* 2019;233:705-710. doi:10.1016/j.chemosphere.2019.05.275
  17. Kinabo C. Comparative analysis of mercury content in human hair and cosmetic products used in Dar es Salaam, Tanzania. *Tanzania J Sci.* 2005;31(1). doi:10.4314/tjs.v31i1.18412

18. Voegborlo R, Voegborlo S, Buabeng-Acheampong B, Zogli E. Total Mercury Content of Skin Toning Creams and the Potential Risk to the Health of Women In Ghana. *J Sci Technol.* 2008;28(1):88-96. doi:10.4314/just.v28i1.33081
19. Alqadami AA, Naushad M, Abdalla MA, et al. Determination of heavy metals in skin-whitening cosmetics using microwave digestion and inductively coupled plasma atomic emission spectrometry. *IET NANOBIO TECHNOLOGY.* 2017;11(5):597-603. doi:10.1049/iet-nbt.2016.0212
20. Alqadami AA, Abdalla MA, AlOthman ZA, Omer K. Application of solid phase extraction on multiwalled carbon nanotubes of some heavy metal ions to analysis of skin whitening cosmetics using ICP-AES. *Int J Env Res Public Heal.* 2013;10(1):361–74. [International journal of environmental re.
21. Maneli MH, Wiesner L, Tinguely C, et al. Combinations of potent topical steroids, mercury and hydroquinone are common in internationally manufactured skin-lightening products: a spectroscopic study. *Clin Exp Dermatol.* 2016;41(2):196–201. [Clinical and experimental dermatology].
22. Ababneh FA, Al-Momani IF. Assessments of toxic heavy metals contamination in cosmetic products. *Environ FORENSICS.* 2018;19(2):134-142. doi:10.1080/15275922.2018.1448908
23. Mohammed T, Mohammed E, Bascombe S. The evaluation of total mercury and arsenic in skin bleaching creams commonly used in Trinidad and Tobago and their potential risk to the people of the Caribbean. *J Public Heal Res.* 2017;6(3):1097. [Journal of public health research].
24. Amponsah D, Voegborlo R, Sebiawu GE. Determination of Amount of Mercury in Some Selected Skin-Lightening Creams Sold in the Ghanaian Market. 2014;5(6):544-550.
25. Cristaudo A, D'Ilio S, Gallinella B, et al. Use of potentially harmful skin-lightening products among immigrant women in Rome, Italy: a pilot study. *Dermatology.* 2013;226(3):200-206.
26. Drescher O, Dewailly E, Krimholtz M, Rutchik J. Fishy Make-up on the Hook for Mercury Exposure: A Case Series. *West Indian Med J.* 2013;62(8):770-2. [The West Indian medical journal].

27. Soo YO-Y, Chow K-M, Lam CW-K, et al. A whitened face woman with nephrotic syndrome. *Am J Kidney Dis.* 2003;41(1):250-253. doi:10.1053/ajkd.2003.50017
28. Sun G-F, Hu W-T, Yuan Z-H, Zhang B-A, Lu H. Characteristics of Mercury Intoxication Induced by Skin-lightening Products. *Chin Med J (Engl).* 2017;130(24):3003+. doi:10.4103/0366-6999.220312
29. Dickenson CA, Woodruff TJ, Stotland NE, Dobraca D, Das R. Elevated mercury levels in pregnant woman linked to skin cream from Mexico. *Am J Obstet Gynecol.* 2013;209(2):e4-5. doi:10.1016/j.ajog.2013.05.030
30. Bwomda P, Sermijn E, Lacor P, Velkeniers B. Glucocorticoid hypertension due to the use of bleaching skin cream, a case report. *Acta Clin Belg.* 2005;60(3):146-149. <https://www.scopus.com/inward/record.uri?eid=2-s2.0-26044473688&partnerID=40&md5=77a10485f1be1937db76c9304a1749b8>
31. Chakera A, Lasserson D, Beck LH, Roberts ISD, Winearls CG. Membranous nephropathy after use of UK-manufactured skin creams containing mercury. *QJM.* 2011;104(10):893-896. doi:10.1093/qjmed/hcq209
32. Ori MR, Larsen JB, Shirazi FM. Mercury Poisoning in a Toddler from Home Contamination due to Skin- Lightening Cream. *J Pediatr.* 2018;196:314+. doi:10.1016/j.jpeds.2017.12.023
33. Copan L, Fowles J, Barreau T, McGee N. Mercury Toxicity and Contamination of Households from the Use of Skin Creams Adulterated with Mercurous Chloride (Calomel). *Int J Environ Res Public Health.* 2015;12(9):10943-10954. doi:10.3390/ijerph120910943
34. Zhang L, Liu F, Peng Y, Sun L, Chen C. Nephrotic syndrome of minimal change disease following exposure to mercury-containing skin-lightening cream. *Ann Saudi Med.* 2014;34(3):257-61. [Annals of Saudi medicine].
35. Tlacuilo-Parra A, Guevara-Gutiérrez E, Luna-Encinas JA. Percutaneous mercury poisoning with a beauty cream in Mexico. *J Am Acad Dermatol.* 2001;45(6):966-7. [Journal of the American Academy of Dermato.

36. Tang HL, Chu KH, Mak YF, et al. Minimal change disease following exposure to mercury-containing skin lightening cream. *Hong Kong Med J*. 2006;12(4):316-318.
37. Rakete S, Asenbauer E, Böhm S, et al. Mercury poisoning of a 4-year-old child by indirect contact to a mercury-containing facial cream: A case report. *SAGE open Med case reports*. 2021;9:2050313X211025227. doi:10.1177/2050313X211025227
38. Chan MM, Cheung RC, Chan IH, Lam CW. An unusual case of mercury intoxication. *Br J Dermatol*. 2001;144(1):192-4. [The British journal of dermatology].
39. Barit J-VJG, Chamberlin CVS, Young PS, et al. Excessive Mercury Levels in an Unregistered Cosmetic Whitening Product Causing Allergic Contact Dermatitis. *Dermatitis*. 2020;31(3):228. doi:10.1097/DER.0000000000000615
40. Kuehn B. Mercury Poisoning From Skin Cream. *JAMA-JOURNAL Am Med Assoc*. 2020;323(6):500. doi:10.1001/jama.2020.0292
41. Kamani A, Au H, Copes R, Thompson M, Ito S. Pediatric Mercury Poisoning from Indirect Exposure to Skin Cream. *Clin Toxicol*. 2019;57(10):1011.
