# Supplementary material
Source: PubMed Central journal article supplement (PMC9651181)
Supplement: ehp10808.smcontents.508.pdf [file ehp10808.smcontents.508.pdf]

**Note to readers with disabilities:** *EHP* strives to ensure that all journal content is accessible to all readers. However, some figures and Supplemental Material published in *EHP* articles may not conform to [508 standards](#) due to the complexity of the information being presented. If you need assistance accessing journal content, please contact [ehp508@niehs.nih.gov](mailto:ehp508@niehs.nih.gov). Our staff will work with you to assess and meet your accessibility needs within 3 working days.

### **Supplemental Material**

#### **A Systematic Review of Mercury Exposures from Skin-Lightening Products**

Ashley Bastiansz, Jessica Ewald, Verónica Rodríguez Saldaña, Andrea Santa-Rios, and Niladri Basu

#### **Table of Contents**

**Table S1.** Measurement instruments and abbreviations used for skin-lightening product analysis. These data cover 738 product samples from 25 studies.

**Table S2.** Measurement instruments and abbreviations used for human biomarker analysis. These data cover 1,042 biomarker measures from 9 studies.

**Table S3.** Different toxic chemicals measured in papers in the “Hg in products” data group.

**Table S4.** Case reports of individuals that experienced an adverse reaction following exposure to a mercury-added skin-lightening product. AFRO = African Region; EMRO = Eastern Mediterranean Region; EURO = European Region; PAHO = Pan America Health Region; SEARO = South-East Asia Region; WPRO = Western Pacific Region.

**Figure S1.** PRISMA flow diagram detailing how articles were identified, reviewed, and deemed eligible for inclusion in the current study.

#### **References**

**Additional File-** Excel Document
